# Supplementary material
Source: PubMed Central journal article supplement (PMC6824992)
Supplement: NIHMS1536669-supplement-1.pdf [file NIHMS1536669-supplement-1.pdf]

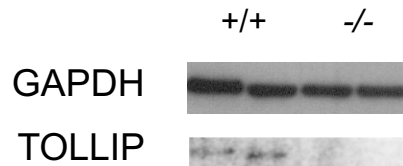

Western blot analysis of TOLLIP expression on macrophages from WT and *Tollip*<sup>-/-</sup> mice. *Tollip*<sup>-/-</sup> mice were rederived and backcrossed on C57Bl/6 background.

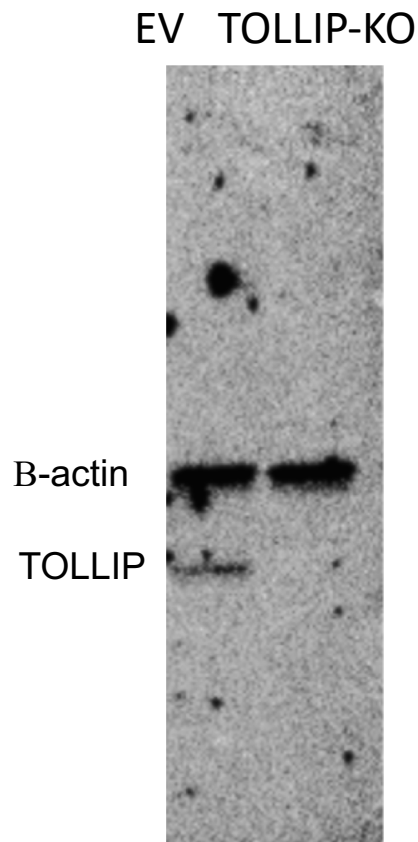

TOLLIP expression was measured by Western blot on THP-1 cell lines with TOLLIP deleted using CRISPR-Cas9 gene editing (TOLLIP-KO) or control, empty vector cell lines with CRISPR-Cas9 machinery transfected (EV), as well as beta-actin loading control.

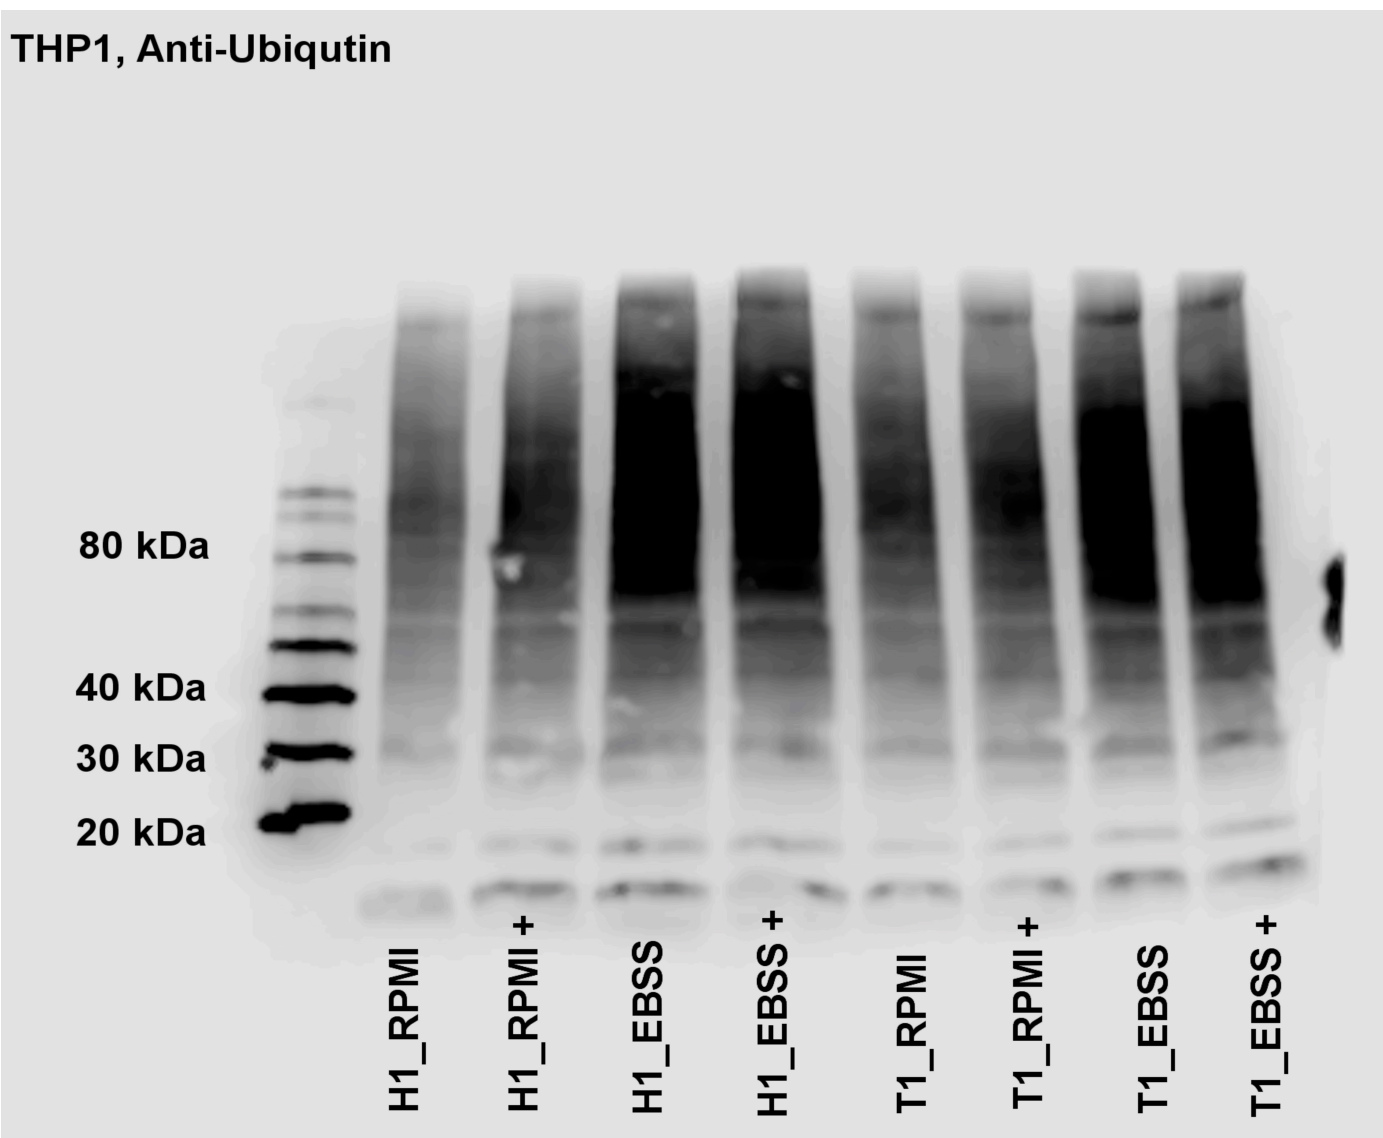

Western blot analysis of ubiquitin expression from TOLLIP-KO (T1) and empty vector (H1) THP-1 cell lines after four hours under nutrient-rich (RPMI) or starvation (EBSS) conditions. + indicates presence of chloroquine, an autophagy inhibitor.
